# Supplementary material for: Comprehensive analysis of the prognostic, immunological, and diagnostic roles of SIRT1 in pan-cancer and its validation in KIRC
Source: Front Immunol. 2025 Jan 8;15:1501867. doi: 10.3389/fimmu.2024.1501867 (PMC11751020; doi:10.3389/fimmu.2024.1501867)
Supplement: Supplementary file 2 [file Table1.xlsx]

## Sheet: Analysis results of Figure 2.A
Group	Normal	Tumor	Confidence interval (95%CI)	p value
ACC	Normal	Tumor	-0.92145 – -0.62466	1.7e-17
BLCA	Normal	Tumor	-1.0284 – -0.65531	2.5e-11
BRCA	Normal	Tumor	-0.20534 – -0.084464	2.24e-06
CESC	Normal	Tumor	-1.0666 – -0.51858	9.07e-06
CHOL	Normal	Tumor	0.21663 – 0.80298	0.004
COAD	Normal	Tumor	-0.22238 – -0.09237	2.25e-06
DLBC	Normal	Tumor	0.45948 – 0.97816	2.5e-07
ESCA	Normal	Tumor	-0.077035 – 0.09383	0.8646
GBM	Normal	Tumor	-0.12588 – 0.010653	0.0989
HNSC	Normal	Tumor	-0.18169 – 0.080011	0.4564
KICH	Normal	Tumor	-0.59891 – -0.19654	0.0003
KIRC	Normal	Tumor	0.20456 – 0.40662	1.5e-08
KIRP	Normal	Tumor	-0.13198 – 0.12974	0.9804
LAML	Normal	Tumor	-0.090374 – 0.049204	0.5753
LGG	Normal	Tumor	0.60583 – 0.71189	1.8e-87
LIHC	Normal	Tumor	-0.19119 – -0.0028875	0.0451
LUAD	Normal	Tumor	0.023603 – 0.14984	0.0071
LUSC	Normal	Tumor	-0.4249 – -0.30092	2.19e-26
OV	Normal	Tumor	-0.98209 – -0.80602	5.33e-40
PAAD	Normal	Tumor	0.3491 – 0.54069	3.69e-16
PCPG	Normal	Tumor	-2.037 – -0.49465	0.0057
PRAD	Normal	Tumor	-0.0060994 – 0.13371	0.0721
READ	Normal	Tumor	-0.24742 – -0.050779	0.0035
SKCM	Normal	Tumor	-0.54346 – -0.42755	5.59e-54
STAD	Normal	Tumor	0.1628 – 0.34137	9.47e-08
TGCT	Normal	Tumor	-0.50921 – -0.28713	2.79e-12
THCA	Normal	Tumor	-0.053559 – 0.041979	0.8435
THYM	Normal	Tumor	0.95401 – 1.3356	1.79e-29
UCEC	Normal	Tumor	-0.80737 – -0.54834	4.52e-21
UCS	Normal	Tumor	-0.51309 – -0.21558	4.66e-06

## Sheet: Analysis results of Figure 2.B
Group	Normal	Tumor	Confidence interval (95%CI)	p value
BLCA	Normal	Tumor	-0.99862 – -0.5071	5.72e-07
BRCA	Normal	Tumor	-0.49283 – -0.32413	4.96e-19
CESC	Normal	Tumor	-1.5022 – -0.054367	0.0380
CHOL	Normal	Tumor	0.21051 – 0.77267	0.0025
COAD	Normal	Tumor	-0.21933 – -0.00074474	0.0483
ESCA	Normal	Tumor	-0.28224 – 0.33678	0.9951
GBM	Normal	Tumor	-0.46958 – 0.058801	0.1432
HNSC	Normal	Tumor	-0.21322 – 0.042633	0.1929
KICH	Normal	Tumor	-0.94079 – -0.54019	3.18e-08
KIRC	Normal	Tumor	-0.023854 – 0.1717	0.1335
KIRP	Normal	Tumor	-0.40832 – -0.15268	2.29e-05
LIHC	Normal	Tumor	-0.27083 – 0.021732	0.0926
LUAD	Normal	Tumor	-0.17792 – 0.033713	0.1824
LUSC	Normal	Tumor	-0.61939 – -0.39682	1.17e-14
PAAD	Normal	Tumor	-0.6796 – 0.13733	0.1769
PCPG	Normal	Tumor	-2.1242 – -0.51543	0.0064
PRAD	Normal	Tumor	-0.20231 – 0.039994	0.1946
READ	Normal	Tumor	-0.89375 – -0.29151	0.0004
STAD	Normal	Tumor	0.091609 – 0.50991	0.0044
THCA	Normal	Tumor	-0.44055 – -0.25424	8.65e-12
UCEC	Normal	Tumor	-1.0341 – -0.62566	1.73e-12

## Sheet: Analysis results of Figure 2.C
Group	Normal	Tumor	Confidence interval (95%CI)	p value
BLCA	Normal	Tumor	-0.92603 – -0.39465	5.34e-05
BRCA	Normal	Tumor	-0.41743 – -0.22738	1.02e-08
CESC	Normal	Tumor	-2.2772 – 0.067317	0.5000
CHOL	Normal	Tumor	0.0087292 – 1.0447	0.0391
COAD	Normal	Tumor	-0.43897 – -0.078278	0.0061
ESCA	Normal	Tumor	-0.38347 – 0.40216	0.8438
HNSC	Normal	Tumor	-0.23347 – 0.028276	0.1436
KICH	Normal	Tumor	-0.79436 – -0.32448	0.0010
KIRC	Normal	Tumor	-0.012644 – 0.22175	0.0834
KIRP	Normal	Tumor	-0.26204 – 0.031862	0.1386
LIHC	Normal	Tumor	-0.3398 – 0.028413	0.0857
LUAD	Normal	Tumor	-0.17025 – 0.049623	0.2583
LUSC	Normal	Tumor	-0.62845 – -0.34956	2.76e-07
PAAD	Normal	Tumor	-0.64584 – -0.20805	0.1250
PCPG	Normal	Tumor	-2.1806 – 0.16035	0.5000
PRAD	Normal	Tumor	-0.011316 – 0.19065	0.0735
READ	Normal	Tumor	-0.82585 – -0.24846	0.0039
STAD	Normal	Tumor	-0.16537 – 0.32467	0.6446
THCA	Normal	Tumor	-0.52778 – -0.25831	1.74e-06
UCEC	Normal	Tumor	-0.80439 – -0.17153	0.0027
