# Supplementary material for: Comprehensive analysis of the prognostic, immunological, and diagnostic roles of SIRT1 in pan-cancer and its validation in KIRC
Source: Front Immunol. 2025 Jan 8;15:1501867. doi: 10.3389/fimmu.2024.1501867 (PMC11751020; doi:10.3389/fimmu.2024.1501867)
Supplement: Supplementary file 3 [file Table2.xlsx]

## Sheet: Sheet1
type	AUC value
BLCA	0.825
BRCA	0.701
CESC	0.833
CHOL	0.838
ESCC	0.902
KICH	0.923
LUSC	0.831
PAAD	0.703
PCPG	0.884
READ	0.788
SARC	0.776
THCA	0.751
THYM	0.821
UCEC	0.864
